# Supplementary material for: Demographic History of Indigenous Populations in Mesoamerica Based on mtDNA Sequence Data
Source: PubMed Central journal article supplement (PMC4546282; doi:10.1371/journal.pone.0131791), 2015-08-20
Supplement: pone.0131791.s001.pdf [file pone.0131791.s001.pdf]

**Table A.** Corrected pairwise differences average (below diagonal) and p-values (above diagonal), among the eight Native Mexican populations based on control region of mtDNA sequences (\*significance 0.05).

|           | Maya_y         | Maya_c         | Maya_qr        | Tojolabal      | Tzotzil        | Mazateca       | Purepecha      | Huichol |
|-----------|----------------|----------------|----------------|----------------|----------------|----------------|----------------|---------|
| Maya_y    | ---            | 0.40274        | 0.76149        | 0.0000*        | 0.0009*        | 0.0351         | 0.0009*        | 0.0000* |
| Maya_c    | -0.02003       | ---            | 0.18866        | 0.0000*        | 0.0000*        | 0.0009*        | 0.0019*        | 0.0000* |
| Maya_qr   | -0.11020       | 0.09675        | ---            | 0.0000*        | 0.0000*        | 0.0244         | 0.0000*        | 0.0000* |
| Tojolabal | <b>3.01232</b> | <b>3.98419</b> | <b>2.57100</b> | ---            | 0.0000*        | 0.0000*        | 0.0000*        | 0.0000* |
| Tzotzil   | <b>0.88280</b> | <b>1.31075</b> | <b>0.86272</b> | <b>1.79463</b> | ---            | 0.0019*        | 0.0000*        | 0.0000* |
| Mazateca  | 0.60602        | <b>1.13206</b> | 0.46218        | <b>1.21540</b> | <b>0.92908</b> | ---            | 0.0000*        | 0.0000* |
| Purepecha | <b>0.77662</b> | <b>0.67696</b> | <b>0.96305</b> | <b>5.83687</b> | <b>2.83165</b> | <b>2.00823</b> | ---            | 0.0000* |
| Huichol   | <b>2.40699</b> | <b>2.95443</b> | <b>2.47122</b> | <b>3.09375</b> | <b>1.39987</b> | <b>2.75520</b> | <b>4.60707</b> | ---     |

**Table B.** AMOVAs based on different classification criteria (\*significance level 0.05) for the eight studied populations.

| Grouping criteria    | Groups                     | Populations                                 |                                 | Variance     | Fixation indices  | P                 |        |
|----------------------|----------------------------|---------------------------------------------|---------------------------------|--------------|-------------------|-------------------|--------|
| Culture I            | Mayan population           | maya_qr, maya_c, maya_y, tzotzil, tojolobal | Within populations              | 92.18        | $F_{ST} = 0.0782$ | 0.0000*           |        |
|                      | No Mayan population        | purepecha, huichol, mazateco                | Among populations within groups | 6.57         | $F_{SC} = 0.0665$ | 0.0000*           |        |
|                      |                            |                                             |                                 | Among groups | 1.25              | $F_{CT} = 0.0125$ | 0.1368 |
| Culture II           | Yucatan peninsula          | maya_qr, maya_c, maya_y                     | Within populations              | 92.61        | $F_{ST} = 0.0739$ | 0.0000*           |        |
|                      | Mayan population           | tzotzil, tojolobal                          | Among populations within groups | 7.02         | $F_{SC} = 0.0704$ | 0.0000*           |        |
|                      | No Mayan population        | purepecha, hichol, mazateco                 | Among groups                    | 0.37         | $F_{CT} = 0.0037$ | 0.0161*           |        |
| Culture Area         | Yucatan peninsula          | maya_qr, maya_c, maya_y                     | Within populations              | 92.59        | $F_{ST} = 0.0741$ | 0.0000*           |        |
|                      | Rest of Mayas of the south | tzotzil, tojolobal                          | Among populations within groups | 6.79         | $F_{SC} = 0.0683$ | 0.0000*           |        |
|                      | Occident                   | purepecha, hichol,                          | Among groups                    | 0.62         | $F_{CT} = 0.0062$ | 0.0148*           |        |
|                      | Oaxaca                     | mazateco                                    |                                 |              |                   |                   |        |
| Language             | Maya                       | maya_qr, maya_c, maya_y, tzotzil, tojolobal | Within populations              | 91.24        | $F_{ST} = 0.0876$ | 0.0000*           |        |
|                      | Oto-Mangue                 | mazateco                                    | Among populations within groups | 3.96         | $F_{SC} = 0.0416$ | 0.0000*           |        |
|                      | Yuto-nahua                 | huichol                                     | Among groups                    | 4.80         | $F_{CT} = 0.0480$ | 0.0098*           |        |
|                      | Purépecha                  | purepecha                                   |                                 |              |                   |                   |        |
| Culture and language | Yucatan Peninsula          | maya_qr, maya_c, maya_y                     | Within populations              | 92.25        | $F_{ST} = 0.0774$ | 0.0000*           |        |
|                      | Others mayan populations   | tzotzil, tojolobal                          | Among populations within groups | 3.73         | $F_{SC} = 0.0388$ | 0.0000*           |        |
|                      | Oto-mangue                 | mazateco                                    | Among groups                    | 4.02         | $F_{CT} = 0.0402$ | 0.0948            |        |
|                      | Yuto-Nahua                 | huichol                                     |                                 |              |                   |                   |        |
|                      | Tarascan                   | purepecha                                   |                                 |              |                   |                   |        |

**Table C.** F<sub>ST</sub> values for the 28 populations included in this study.

|            | Zuni  | Hualapai | Pima_k | Papago | Pima_a | Tarahumara | Mayo  | Cora  | Huichol_k | Huichol_a | Huichol_h | Purpecha | Otomi_v | Otomi_s | Tepehua | Nahua_at | Nahua_cu | Nahua_hu | Mazateco | Mixe  | Mixteco | Zapoteco | Tojolobal | Tzotzil | Maya_y | Maya_c | Maya_qr | Maya_a |  |
|------------|-------|----------|--------|--------|--------|------------|-------|-------|-----------|-----------|-----------|----------|---------|---------|---------|----------|----------|----------|----------|-------|---------|----------|-----------|---------|--------|--------|---------|--------|--|
| Zuni       | 0.000 |          |        |        |        |            |       |       |           |           |           |          |         |         |         |          |          |          |          |       |         |          |           |         |        |        |         |        |  |
| Hualapai   | 0.150 | 0.000    |        |        |        |            |       |       |           |           |           |          |         |         |         |          |          |          |          |       |         |          |           |         |        |        |         |        |  |
| Pima_k     | 0.108 | 0.056    | 0.000  |        |        |            |       |       |           |           |           |          |         |         |         |          |          |          |          |       |         |          |           |         |        |        |         |        |  |
| Papago     | 0.126 | 0.064    | 0.010  | 0.000  |        |            |       |       |           |           |           |          |         |         |         |          |          |          |          |       |         |          |           |         |        |        |         |        |  |
| Pima_a     | 0.162 | 0.096    | 0.067  | 0.074  | 0.000  |            |       |       |           |           |           |          |         |         |         |          |          |          |          |       |         |          |           |         |        |        |         |        |  |
| Tarahumara | 0.138 | 0.088    | 0.056  | 0.066  | 0.087  | 0.000      |       |       |           |           |           |          |         |         |         |          |          |          |          |       |         |          |           |         |        |        |         |        |  |
| Mayo       | 0.109 | 0.066    | 0.037  | 0.042  | 0.076  | 0.056      | 0.000 |       |           |           |           |          |         |         |         |          |          |          |          |       |         |          |           |         |        |        |         |        |  |
| Cora       | 0.130 | 0.068    | 0.038  | 0.042  | 0.078  | 0.066      | 0.046 | 0.000 |           |           |           |          |         |         |         |          |          |          |          |       |         |          |           |         |        |        |         |        |  |
| Huichol_k  | 0.104 | 0.101    | 0.069  | 0.077  | 0.111  | 0.097      | 0.072 | 0.067 | 0.000     |           |           |          |         |         |         |          |          |          |          |       |         |          |           |         |        |        |         |        |  |
| Huichol_a  | 0.128 | 0.062    | 0.032  | 0.036  | 0.072  | 0.060      | 0.037 | 0.028 | 0.030     | 0.000     |           |          |         |         |         |          |          |          |          |       |         |          |           |         |        |        |         |        |  |
| Huichol_h  | 0.210 | 0.147    | 0.115  | 0.123  | 0.156  | 0.145      | 0.124 | 0.100 | 0.084     | 0.058     | 0.000     |          |         |         |         |          |          |          |          |       |         |          |           |         |        |        |         |        |  |
| Purpecha   | 0.141 | 0.078    | 0.047  | 0.055  | 0.087  | 0.079      | 0.058 | 0.049 | 0.092     | 0.053     | 0.137     | 0.000    |         |         |         |          |          |          |          |       |         |          |           |         |        |        |         |        |  |
| Otomi_v    | 0.120 | 0.059    | 0.031  | 0.037  | 0.065  | 0.060      | 0.039 | 0.040 | 0.054     | 0.016     | 0.102     | 0.050    | 0.000   |         |         |          |          |          |          |       |         |          |           |         |        |        |         |        |  |
| Otomi_s    | 0.118 | 0.057    | 0.030  | 0.035  | 0.067  | 0.057      | 0.036 | 0.039 | 0.071     | 0.032     | 0.115     | 0.049    | 0.023   | 0.000   |         |          |          |          |          |       |         |          |           |         |        |        |         |        |  |
| Tepehua    | 0.139 | 0.075    | 0.047  | 0.053  | 0.084  | 0.076      | 0.055 | 0.055 | 0.064     | 0.026     | 0.116     | 0.066    | 0.030   | 0.045   | 0.000   |          |          |          |          |       |         |          |           |         |        |        |         |        |  |
| Nahua_at   | 0.119 | 0.055    | 0.023  | 0.030  | 0.063  | 0.056      | 0.034 | 0.030 | 0.065     | 0.026     | 0.109     | 0.045    | 0.024   | 0.023   | 0.041   | 0.000    |          |          |          |       |         |          |           |         |        |        |         |        |  |
| Nahua_cu   | 0.118 | 0.051    | 0.021  | 0.027  | 0.061  | 0.051      | 0.029 | 0.032 | 0.066     | 0.025     | 0.115     | 0.042    | 0.022   | 0.020   | 0.039   | 0.017    | 0.000    |          |          |       |         |          |           |         |        |        |         |        |  |
| Nahua_hu   | 0.108 | 0.050    | 0.024  | 0.029  | 0.058  | 0.048      | 0.028 | 0.032 | 0.060     | 0.021     | 0.100     | 0.043    | 0.017   | 0.020   | 0.035   | 0.019    | 0.013    | 0.000    |          |       |         |          |           |         |        |        |         |        |  |
| Mazateco   | 0.136 | 0.070    | 0.041  | 0.047  | 0.080  | 0.062      | 0.041 | 0.046 | 0.085     | 0.043     | 0.130     | 0.062    | 0.042   | 0.039   | 0.058   | 0.038    | 0.030    | 0.031    | 0.000    |       |         |          |           |         |        |        |         |        |  |
| Mixe       | 0.143 | 0.079    | 0.050  | 0.056  | 0.088  | 0.080      | 0.058 | 0.053 | 0.093     | 0.054     | 0.139     | 0.070    | 0.051   | 0.049   | 0.067   | 0.047    | 0.042    | 0.043    | 0.062    | 0.000 |         |          |           |         |        |        |         |        |  |
| Mixteco    | 0.125 | 0.062    | 0.034  | 0.040  | 0.067  | 0.056      | 0.042 | 0.044 | 0.074     | 0.034     | 0.121     | 0.054    | 0.035   | 0.034   | 0.051   | 0.030    | 0.026    | 0.028    | 0.046    | 0.054 | 0.000   |          |           |         |        |        |         |        |  |
| Zapoteco   | 0.114 | 0.053    | 0.024  | 0.029  | 0.063  | 0.054      | 0.032 | 0.026 | 0.060     | 0.020     | 0.102     | 0.045    | 0.025   | 0.024   | 0.042   | 0.017    | 0.016    | 0.017    | 0.037    | 0.043 | 0.026   | 0.000    |           |         |        |        |         |        |  |
| Tojolobal  | 0.160 | 0.097    | 0.068  | 0.073  | 0.108  | 0.099      | 0.078 | 0.058 | 0.100     | 0.062     | 0.133     | 0.089    | 0.070   | 0.068   | 0.084   | 0.060    | 0.063    | 0.058    | 0.082    | 0.089 | 0.074   | 0.056    | 0.000     |         |        |        |         |        |  |
| Tzotzil    | 0.129 | 0.067    | 0.039  | 0.045  | 0.077  | 0.068      | 0.047 | 0.048 | 0.078     | 0.040     | 0.122     | 0.059    | 0.038   | 0.038   | 0.053   | 0.035    | 0.031    | 0.033    | 0.048    | 0.056 | 0.044   | 0.034    | 0.070     | 0.000   |        |        |         |        |  |
| Maya_y     | 0.109 | 0.045    | 0.014  | 0.021  | 0.055  | 0.046      | 0.024 | 0.026 | 0.060     | 0.019     | 0.108     | 0.035    | 0.017   | 0.014   | 0.034   | 0.010    | 0.007    | 0.008    | 0.027    | 0.034 | 0.019   | 0.011    | 0.056     | 0.025   | 0.000  |        |         |        |  |
| Maya_c     | 0.119 | 0.054    | 0.020  | 0.029  | 0.064  | 0.052      | 0.030 | 0.034 | 0.067     | 0.027     | 0.113     | 0.043    | 0.026   | 0.024   | 0.042   | 0.020    | 0.016    | 0.018    | 0.034    | 0.045 | 0.028   | 0.020    | 0.066     | 0.034   | 0.008  | 0.000  |         |        |  |
| Maya_qr    | 0.114 | 0.053    | 0.025  | 0.030  | 0.063  | 0.054      | 0.032 | 0.035 | 0.067     | 0.028     | 0.113     | 0.045    | 0.025   | 0.024   | 0.041   | 0.021    | 0.017    | 0.016    | 0.033    | 0.044 | 0.028   | 0.019    | 0.059     | 0.021   | 0.006  | 0.014  | 0.000   |        |  |
| Maya_a     | 0.128 | 0.065    | 0.034  | 0.043  | 0.077  | 0.068      | 0.047 | 0.049 | 0.082     | 0.042     | 0.129     | 0.057    | 0.038   | 0.036   | 0.053   | 0.033    | 0.030    | 0.021    | 0.051    | 0.059 | 0.043   | 0.029    | 0.073     | 0.048   | 0.018  | 0.029  | 0.026   | 0.000  |  |

**Table D.** AMOVAs based on different classification criteria (\*significance level 0.05) the twenty eight populations included in this study.

| Grouping criteria            | Groups                                              | Populations                                                                                                                                                                                                          |                                 | Variance | Fixation indices  | P       |
|------------------------------|-----------------------------------------------------|----------------------------------------------------------------------------------------------------------------------------------------------------------------------------------------------------------------------|---------------------------------|----------|-------------------|---------|
| Prehispanic area             | Mesoamerica                                         | cora, huichol_k, huichol_a, huichol_h, purepecha, otomi_v, otomi_s, tepehuas, nahua_at, nahua_cu, nahua_hu, mazateca, mixe, mixteco, zapoteco, tojolobal, tzotzil, maya_a, maya_qr, maya_y, maya_c, tarahumara, mayo | Within populations              | 76.36    | $F_{ST} = 0.2364$ | 0.0000* |
|                              | Oasisamerica                                        | hualapai, zuni, pima_k, pima_a, papago,                                                                                                                                                                              | Among populations within groups | 15.06    | $F_{SC} = 0.1647$ | 0.0000* |
|                              |                                                     |                                                                                                                                                                                                                      | Among groups                    | 8.59     | $F_{CT} = 0.0858$ | 0.0000* |
| Geographic and Cultural area | Maya                                                | tojolobal, tzotzil, maya_a, maya_qr, maya_c, maya_y                                                                                                                                                                  | Within populations              | 80.27    | $F_{ST} = 0.1972$ | 0.0000* |
|                              | Oaxaca                                              | mazateco, mixe, mixteco, zapoteco                                                                                                                                                                                    | Among populations within groups | 13.32    | $F_{SC} = 0.1423$ | 0.0000* |
|                              | Centro                                              | nahua_at, nahua_cu, nahua_hu, otomi_v, otomi_s                                                                                                                                                                       | Among groups                    | 6.40     | $F_{CT} = 0.0640$ | 0.0000* |
|                              | Gulf                                                | tepehua                                                                                                                                                                                                              |                                 |          |                   |         |
|                              | Occident                                            | cora, huichol_k, huichol_a, huichol_h, purepecha                                                                                                                                                                     |                                 |          |                   |         |
|                              | North                                               | mayo, tarahumara                                                                                                                                                                                                     |                                 |          |                   |         |
|                              | South USA                                           | hualapai, zuni, pima_k, pima_a, papago                                                                                                                                                                               |                                 |          |                   |         |
| Languages                    | Aztec-tanoan                                        | zuni                                                                                                                                                                                                                 | Within populations              | 94.19    | $F_{ST} = 0.0580$ | 0.0000* |
|                              | YCoachimí-Yuman                                     | hualapai                                                                                                                                                                                                             | Among populations within groups | 4.93     | $F_{SC} = 0.0497$ | 0.0000* |
|                              | Uto-aztecan                                         | pima_k, pima_a, papago, tarahumara, mayo, cora, huichol_k, huichol_h, huichol_a, nahua_at, nahua_cu, nahua_hu                                                                                                        | Among groups                    | 0.88     | $F_{CT} = 0.0088$ | 0.0840  |
|                              | Tarascan                                            | purepecha                                                                                                                                                                                                            |                                 |          |                   |         |
|                              | Otomanguean                                         | otomi_s, otomi_v, mazateco, zapoteco, mixteco                                                                                                                                                                        |                                 |          |                   |         |
|                              | Totonacan, Tepehua                                  | tepehua                                                                                                                                                                                                              |                                 |          |                   |         |
|                              | Mixe-Zoquean                                        | mixe                                                                                                                                                                                                                 |                                 |          |                   |         |
| Mayan                        | maya_qr, maya_a, maya_y, maya_c, tojolobal, tzotzil |                                                                                                                                                                                                                      |                                 |          |                   |         |

**Table E.** Number of shared haplotypes between the twenty eight Native American populations based on HVRI data.

|          |             | North |          |        |        |        |             | Occident |      |           |           |           | Center    |         |         |         |          | Oaxaca   |          |          |      | Mayas   |          |           |         |        |        |         |        |
|----------|-------------|-------|----------|--------|--------|--------|-------------|----------|------|-----------|-----------|-----------|-----------|---------|---------|---------|----------|----------|----------|----------|------|---------|----------|-----------|---------|--------|--------|---------|--------|
|          |             | Zuni  | Hualapai | Pima_k | Papago | Pima_a | Tarahumaras | Mayo     | Cora | Huichol_k | Huichol_a | Huichol_h | Purépecha | Otomí_v | Otomí_s | Tepehua | Nahua_at | Nahua_cu | Nahua_hu | Mazateco | Mixe | Mixteco | Zapoteco | Tojolobal | Tzotzil | Maya_y | Maya_c | Maya_qr | Maya_a |
| North    | Zunis       |       |          |        |        |        |             |          |      |           |           |           |           |         |         |         |          |          |          |          |      |         |          |           |         |        |        |         |        |
|          | Hualapai    | 3     |          |        |        |        |             |          |      |           |           |           |           |         |         |         |          |          |          |          |      |         |          |           |         |        |        |         |        |
|          | Pima_k      | 2     | 3        |        |        |        |             |          |      |           |           |           |           |         |         |         |          |          |          |          |      |         |          |           |         |        |        |         |        |
|          | Papago      | 1     | 1        | 10     |        |        |             |          |      |           |           |           |           |         |         |         |          |          |          |          |      |         |          |           |         |        |        |         |        |
|          | Pima_a      | 1     | 1        | 1      | 1      |        |             |          |      |           |           |           |           |         |         |         |          |          |          |          |      |         |          |           |         |        |        |         |        |
|          | Tarahumaras | 2     | 2        | 1      | 1      | 2      |             |          |      |           |           |           |           |         |         |         |          |          |          |          |      |         |          |           |         |        |        |         |        |
|          | Mayo        | 2     | 3        | 2      | 2      | 3      | 4           |          |      |           |           |           |           |         |         |         |          |          |          |          |      |         |          |           |         |        |        |         |        |
| Occident | Cora        | 1     | 1        | 2      | 3      | 1      | 2           | 3        |      |           |           |           |           |         |         |         |          |          |          |          |      |         |          |           |         |        |        |         |        |
|          | Huichol_k   | 2     | 2        | 2      | 1      | 1      | 1           | 2        | 3    |           |           |           |           |         |         |         |          |          |          |          |      |         |          |           |         |        |        |         |        |
|          | Huichol_a   | 0     | 0        | 1      | 2      | 1      | 1           | 2        | 3    | 6         |           |           |           |         |         |         |          |          |          |          |      |         |          |           |         |        |        |         |        |
|          | Huichol_h   | 2     | 3        | 2      | 2      | 2      | 3           | 4        | 4    | 7         | 6         |           |           |         |         |         |          |          |          |          |      |         |          |           |         |        |        |         |        |
|          | Purépecha   | 1     | 2        | 1      | 0      | 1      | 1           | 2        | 1    | 1         | 0         | 2         |           |         |         |         |          |          |          |          |      |         |          |           |         |        |        |         |        |
| Center   | Otomí_v     | 2     | 4        | 4      | 2      | 3      | 1           | 3        | 3    | 4         | 3         | 5         | 5         |         |         |         |          |          |          |          |      |         |          |           |         |        |        |         |        |
|          | Otomí_s     | 1     | 2        | 2      | 2      | 2      | 2           | 4        | 4    | 4         | 4         | 6         | 3         | 14      |         |         |          |          |          |          |      |         |          |           |         |        |        |         |        |
|          | Tepehua     | 1     | 2        | 0      | 1      | 2      | 2           | 3        | 4    | 3         | 3         | 5         | 3         | 6       | 7       |         |          |          |          |          |      |         |          |           |         |        |        |         |        |
|          | Nahua_at    | 1     | 2        | 2      | 1      | 3      | 1           | 2        | 2    | 4         | 2         | 4         | 4         | 8       | 8       | 5       |          |          |          |          |      |         |          |           |         |        |        |         |        |
|          | Nahua_cu    | 1     | 1        | 2      | 1      | 1      | 1           | 2        | 4    | 4         | 3         | 4         | 2         | 6       | 7       | 3       | 5        |          |          |          |      |         |          |           |         |        |        |         |        |
|          | Nahuas_hu   | 1     | 3        | 2      | 2      | 2      | 2           | 5        | 4    | 4         | 4         | 6         | 7         | 13      | 14      | 8       | 7        | 10       |          |          |      |         |          |           |         |        |        |         |        |
| Oaxaca   | Mazateco    | 1     | 1        | 1      | 1      | 0      | 1           | 1        | 4    | 1         | 1         | 2         | 2         | 3       | 3       | 3       | 3        | 3        | 5        |          |      |         |          |           |         |        |        |         |        |
|          | Mixe        | 1     | 2        | 2      | 1      | 2      | 1           | 3        | 2    | 3         | 1         | 3         | 4         | 6       | 5       | 3       | 6        | 4        | 6        | 5        |      |         |          |           |         |        |        |         |        |
|          | Mixteco     | 1     | 3        | 1      | 1      | 2      | 1           | 3        | 3    | 4         | 3         | 5         | 3         | 6       | 6       | 4       | 5        | 4        | 7        | 2        | 5    |         |          |           |         |        |        |         |        |
|          | Zapoteco    | 1     | 3        | 1      | 2      | 2      | 2           | 3        | 3    | 4         | 4         | 5         | 2         | 7       | 7       | 4       | 6        | 3        | 9        | 3        | 4    | 7       |          |           |         |        |        |         |        |
| Mayas    | Tojolobal   | 1     | 2        | 1      | 1      | 1      | 0           | 2        | 2    | 2         | 1         | 2         | 2         | 4       | 4       | 3       | 4        | 2        | 5        | 1        | 3    | 5       | 5        |           |         |        |        |         |        |
|          | Tzotzil     | 1     | 2        | 2      | 1      | 1      | 0           | 2        | 3    | 3         | 2         | 3         | 2         | 5       | 6       | 3       | 4        | 3        | 7        | 1        | 2    | 4       | 6        | 3         |         |        |        |         |        |
|          | Maya_y      | 2     | 2        | 1      | 1      | 2      | 2           | 2        | 3    | 2         | 1         | 3         | 4         | 7       | 6       | 3       | 4        | 4        | 8        | 3        | 4    | 4       | 4        | 3         | 3       |        |        |         |        |
|          | Maya_c      | 1     | 2        | 1      | 2      | 2      | 0           | 4        | 3    | 3         | 3         | 5         | 3         | 4       | 7       | 4       | 3        | 4        | 8        | 2        | 4    | 5       | 5        | 5         | 3       | 9      |        |         |        |
|          | Maya_qr     | 1     | 1        | 0      | 1      | 0      | 1           | 2        | 3    | 2         | 4         | 3         | 3         | 5       | 7       | 5       | 3        | 3        | 9        | 2        | 2    | 5       | 5        | 5         | 5       | 4      | 8      |         |        |
|          | Maya_a      | 1     | 2        | 1      | 1      | 1      | 2           | 2        | 2    | 1         | 1         | 3         | 2         | 3       | 4       | 3       | 2        | 1        | 5        | 2        | 2    | 2       | 4        | 1         | 3       | 4      | 6      | 6       |        |

**Table F.** Estimates for maximum and minimum Nef values for each of the indigenous groups studied.

|                    |            | <b>Maximum</b> | <b>Minimum</b> |
|--------------------|------------|----------------|----------------|
| <b>North</b>       | Hulapai    | 28.634         | 9.487          |
|                    | Zuni       | 49.146         | 4.863          |
|                    | Pima_k     | 74.564         | 16.877         |
|                    | Papago     | 89.956         | 15.075         |
|                    | Pima_a     | 21.115         | 9.433          |
|                    | Mayo       | 106.322        | 16.274         |
|                    | Tarahumara | 27.301         | 4.226          |
| <b>Occident</b>    | Huichol_h  | 17.621         | 3.989          |
|                    | Huichol_k  | 28.949         | 2.302          |
|                    | Huichol_a  | 125.412        | 20.556         |
|                    | Cora       | 72.703         | 12.585         |
|                    | Purepecha  | 44.511         | 8.188          |
| <b>Center</b>      | Otomies_v  | 151.472        | 13.260         |
|                    | Otomies_s  | 177.007        | 13.818         |
|                    | Tepehua    | 31.302         | 16.395         |
|                    | Nahua_hu   | 255.025        | 11.838         |
|                    | Nahua_cu   | 203.549        | 15.009         |
|                    | Nahua_at   | 216.576        | 14.362         |
| <b>Oaxaca</b>      | Mazateco   | 66.954         | 7.749          |
|                    | Mixe       | 33.796         | 17.596         |
|                    | Mixteco    | 102.445        | 9.470          |
|                    | Zapoteco   | 193.865        | 17.496         |
| <b>Maya region</b> | Maya_y     | 522.057        | 12.188         |
|                    | Maya_a     | 85.325         | 13.804         |
|                    | Maya_c     | 157.116        | 10.201         |
|                    | Maya_qr    | 170.224        | 11.184         |
|                    | Tzolzil    | 69.017         | 6.341          |
|                    | Tojolobal  | 16.409         | 2.765          |

**Table G.** Temporary distribution for Nef and IGR maximum and minimum values and period in which the IRG trend inverted. Nef, effective number female; IGR, intergenerational rate of population increase. Data in YBP.

|             |            | Tendency    | Nef     |         | IGR     |         |
|-------------|------------|-------------|---------|---------|---------|---------|
|             |            |             | Maximum | Minimum | Maximum | Minimum |
| North       | Hulapai    | 2,500-2,475 | 2,550   | Current | 6,025   | Current |
|             | Zuni       | 3,400-3,375 | 3,700   | Current | 6,350   | Current |
|             | Pima_k     | 1,250-1,225 | 1,425   | 16,700  | 4,775   | Current |
|             | Papago     | 1,175-1,150 | 1,275   | 15,075  | 3,725   | 75      |
|             | Pima_a     | 1,850-1,825 | 1,875   | Current | 3,675   | Current |
|             | Mayo       | 1,200-1,175 | 1,225   | 17,975  | 5,100   | Current |
|             | Tarahumara | 2,100-2,075 | 2,100   | Current | 15,175  | Current |
| Occident    | Huichol_h  | 3,950-3,925 | 4,725   | Current | 13,450  | Current |
|             | Huichol_k  | 1,975-1,950 | 1,975   | Current | 4,450   | Current |
|             | Huichol_a  | 100-75      | 100     | 16,575  | 1,100   | 25      |
|             | Cora       | 2,300-2,275 | 2,300   | 14,475  | 5,200   | Current |
|             | Purepecha  | 1,925-1,900 | 1,875   | Current | 4,300   | Current |
| Center      | Otomies_v  | 2,750-2,725 | 2,750   | 16,250  | 6,225   | Current |
|             | Otomies_s  | 0-25        | 3,975   | 18,825  | 275     | 1,225   |
|             | Tepehua    | 875-850     | 925     | 16,395  | 2,000   | Current |
|             | Nahua_hu   | 3,025-3,000 | 3,075   | 18,125  | 7,050   | 1,050   |
|             | Nahua_cu   | 3,575-3,550 | 3,475   | 18,700  | 8,050   | 75      |
|             | Nahua_at   | 2,650-2,625 | 2,775   | 14,362  | 7,725   | 150     |
| Oaxaca      | Mazateco   | 2,925-2,900 | 3,000   | Current | 6,325   | 25      |
|             | Mixe       | 3,000-2,975 | 3,250   | 577     | 250     | 900     |
|             | Mixteco    | 3,150-3,125 | 3,150   | Current | 6,575   | Current |
|             | Zapoteco   | 2,925-2,900 | 2,925   | 18,575  | 6,375   | 25      |
| Maya region | Maya_y     | 425-400     | 625     | 18,475  | 7,525   | 150     |
|             | Maya_a     | 3,125-3,100 | 3,125   | 15,825  | 6,825   | 25      |
|             | Maya_c     | 3,400-3,375 | 3,600   | 15,200  | 7,075   | 100     |
|             | Maya_qr    | 2,550-2,500 | 2,650   | 17,050  | 7,200   | 25      |
|             | Tzolzil    | 2,450-2,425 | 2,450   | Current | 5,550   | Current |
|             | Tojolobal  | 1,175-1,150 | 1,175   | Current | 2,350   | Current |
